# Supplementary material for: Extracellular Vesicle Secretion by Leukemia Cells In Vivo Promotes CLL Progression by Hampering Antitumor T-cell Responses
Source: Blood Cancer Discov. 2022 Sep 14;4(1):54–77. doi: 10.1158/2643-3230.BCD-22-0029 (PMC9816815; doi:10.1158/2643-3230.BCD-22-0029)
Supplement: Supplementary Table S3 — Supplemental Table S3 - Patient clinical information [file bcd-22-0029_supplementary_table_s3_suppst3.xlsx]

## Sheet: CLL patients
Supplemental Table S3: Clinical characteristics of patient samples
median age: 62 months (range 34-90)
median follow-up: 83 months (range 1-397)
median TFS: 76 months (range 1-280)
median OS: 311 months (range 1-397)
					Treatment-Free Survival			Overall survival
			n	%	median TFS (months)	P	χ²(1)	median OS (months)	P	χ²(1)
Patients			144
		Male	85	59.0278	74.3	0.9973	0	310.6	0.2982	1.08
		Female	59	40.9722	78.23			197.9
Binet			144
Stage A			99	68.75	87.2	<0.0001	19.56	310.6	0.0003	16.54
Stage B			27	18.75	37.3			241.7
Stage C			18	12.5	25.9			106.2
Mutational statusa			144
IgVH - Mutated			85	59.0278	101	<0.0001	26.91	>397	0.0012	10.51
IgVH - Unmutated			59	40.9722	37.3			174.43
ZAP-70b			144
<140 (negative)			71	49.3056	131.23	<0.0001	23.84	396.57	0.0015	10.03
>140 (positive)			73	50.6944	39			241.87
LPLb			144
<13.65(negative)			77	53.4722	126	0.0005	12.15	310.6	0.0302	74.7
>13.65 (positive)			67	46.5278	47.63			174.43
CD38b			144
<7% (negative)			79	54.8611	120	0.0002	13.47	396.57	0.0035	8.15
>7% (positive)			65	45.1389	41.63			159
LDT			124
> 1year			87	70.1613	101	<0.0001	24.92	310.6	0.0018	9.76
< 1year			37	29.8387	29.33			159
Soluble CD23b			141
<120 U (negative)			80	56.7376	97	0.0045	8.08	>397	0.047	3.94
>120 U (positive)			61	43.2624	41.6			241.87
Cytogenetic abnormalitiesc			114
normal,del(13q), other			66	57.8947	87.2	0.0278	4.84	310.6	0.0004	12.69
del(17p), (11q), (6q), +12, complex			48	42.1053	39			159
a Mutational status is based on a 98% cut-off value. Patients with stereotyped IgHV3-21 have been included in the UM subgroup independently of their mutational status.
b The cut-off determined using ROC curve analysis maximising the concordance with the IgHV status
c Among patients with unfavorable cytogenetic abnormalities (n=48), we found 7 patients with a del(17p) (14.6%), 13 with a del(11q) (27.1%), 9 with del(6q) (18.8%), and 16 with a trisomy-12 (33.3%). Furthermore, 3 patients present a complex karyotype associated with poor prognosis (6.3%). Among patients with favorable cytogenetic abnormalities (n=66), we found 35 patients with del(13q) (53.0%) an…
