# Supplementary material for: Extracellular Vesicle Secretion by Leukemia Cells In Vivo Promotes CLL Progression by Hampering Antitumor T-cell Responses
Source: Blood Cancer Discov. 2022 Sep 14;4(1):54–77. doi: 10.1158/2643-3230.BCD-22-0029 (PMC9816815; doi:10.1158/2643-3230.BCD-22-0029)
Supplement: Supplementary Table S4 — Supplemental Table S4 - Flow cytometry antibody list [file bcd-22-0029_supplementary_table_s4_suppst4.xlsx]

## Sheet: Table S4_antibodies
Supplemental Table S4: List of antibodies used in flow cytometry
Antigen	Fluorochrome	Clone	Manufacturer	Reference	Other name	RRIDs
4-1BB	PE	TKS-1	Biolegend	107105	CD137L	AB_2256408
B7-H4	APC	REA392	Miltenyi	130-106-340	VTCN1	AB_2651249
CD134	APC	REA625	Miltenyi	130-109-742	OX-40	AB_2654944
CD152	APC	UC10-4B9	Miltenyi	130-102-518	CTLA-4	AB_2655253
CD160	APC	REA669	Miltenyi	130-110-158		AB_2655437
CD19	APC	6D5	Biolegend	115512		AB_313647
CD20	PE	SA275A11	Biolegend	150409		AB_2566778
CD200	APC	OX-90	Biolegend	123809	OX-2	AB_10900996
CD200R	PE	OX-110	Biolegend	123907	OX-2R	AB_2074081
CD223	BV421	C9B7W	Biolegend	125221	LAG-3	AB_2572080
CD223	PE	C9B7W	Miltenyi	130-102-578	LAG-3	AB_2656422
CD226	PE/Cy7	TX 42.1	Biolegend	133625	DNAM-1	AB_2716223
CD244.2	APC	REA388	Miltenyi	130-105-989	2B4	AB_2656631
CD252	PE	RM134L	Biolegend	108805	OX40L	AB_313404
CD27	BV650	LG.3A10	Biolegend	124233		AB_2687192
CD270	APC	REA275	Miltenyi	130-102-772	TNFRSF14	AB_2656841
CD272	PE	REA224	Miltenyi	130-102-689	BTLA	AB_2656857
CD274	APC	10F.9G2	Biolegend	124312	PD-L1	AB_10612741
CD274	PE/Dazzle	10F.9G2	Biolegend	124323	PD-L1	AB_2565638
CD278	APC	7E.17G9	Miltenyi	130-102-497	ICOS	AB_2660678
CD279	BV510	29F.1A12	Biolegend	135241	PD-1	AB_2715761
CD279	BV605	29F.1A12	Biolegend	135219	PD1	AB_11125371
CD279	APC	REA802	Miltenyi	130-111-954	PD-1	AB_2656935
CD28	PE/Cy7	37.51	Biolegend	102125	Tp44, T44	AB_2617042
CD357	PE/Cy7	DTA-1	Biolegend	126317	GITR	AB_2563385
CD39	PE/Cy7	Duha59	Biolegend	143805		AB_2563393
CD4	APC	1B12	Biolegend	100516		AB_312719
CD4	APC/Cy7	1B13	Biolegend	100568		AB_2629699
CD44	Alexa Fluor 700	IM7	Biolegend	103026		AB_493713
CD48	PE	HM48-1	Miltenyi	130-102-609	BLAST-1	AB_2658428
CD5	PE	1B16	Biolegend	100608		AB_312737
CD62L	PE/Cy7	MEL-14	Biolegend	104418		AB_313103
CD63	PE	REA563	Miltenyi	130-108-893		AB_2658903
CD66a	PE/Cy7	Mab-CC1	Biolegend	134515	CEACAM1a	AB_2632802
CD73	APC	TY/11.8	Biolegend	127209		AB_11219400
CD80	PE	16-10A1	Biolegend	104707		AB_313128
CD81	APC	EAT2	Miltenyi	130-102-630		AB_2659290
CD86	APC	GL-1	Biolegend	105011		AB_493343
CD8a	APC	53-6.7	Biolegend	100712		AB_312751
CD8a	BV650	53-6.7	Biolegend	100742		AB_2563056
CD9	APC-CY7	1B22	Miltenyi	130-102-384		AB_2659590
CD96	APC	3.3	Biolegend	131711	Tactile	AB_2650740
DR3	PE	4C12	Biolegend	144405	Apo-3	AB_2561688
FasL	APC	MFL3	Biolegend	106609		AB_2813951
Galectin-9	APC	RG9-35	Biolegend	136109		AB_2561657
Galectin-9	BV421	RG9-35	BD Biosciences	566028		AB_2739472
Granzyme B	PE	QA16A02	Biolegend	372208		AB_2687032
IFNy	BV711	XMG1.2	Biolegend	505836		AB_2650928
IL-2	PE/Cy5	JES6-5H4	Biolegend	503824		AB_2123674
KLRG1	BV711	2F1/KLRG1	Biolegend	138426		AB_2566554
KLRG1	PE	2F1	Miltenyi	130-102-408		AB_2652583
MHC-I	PE	M1/42	Biolegend	125505		AB_1227706
MHC-II	APC	M5/114.15.2	Biolegend	107614		AB_313329
Perforin	APC	eBioOMAK-D	Thermo	17-9392-80		AB_469514
TIGIT	PE	GIGD7	eBiosciences	12-9501-82		AB_11042152
TIM-3	APC	REA602	Miltenyi	130-109-448		AB_2654176
TIM-3	FITC	RMT3-23	Invitrogen	11-5870-82		AB_2688129
TNFa	APC	MP6-XT22	Biolegend	506308		AB_315429
Zombie (Dye)	UV		Biolegend	423108
Zombie (Dye)	NIR		Biolegend	423106
